# Supplementary material for: A Randomized Trial Investigating the Pharmacokinetics, Pharmacodynamics, and Safety of Subcutaneous Semaglutide Once-Weekly in Healthy Male Japanese and Caucasian Subjects
Source: Springer Nature journal article supplement (doi:10.1007/s12325-018-0677-1), 2018-03-13
Supplement: MOESM1 [file 15531240]

## **Supplementary Online Material**

**Title:** A randomized trial investigating the pharmacokinetics, pharmacodynamics and safety of subcutaneous semaglutide once-weekly in healthy male Japanese and Caucasian subjects

**Authors:** Ippei Ikushima, Lene Jensen, Anne Flint, Tomoyuki Nishida, Jeppe Zacho and Shin Irie

## Figure legends

*Supplementary Figure S1. Mean semaglutide profile at steady state: 0–840 hours after the last dose*

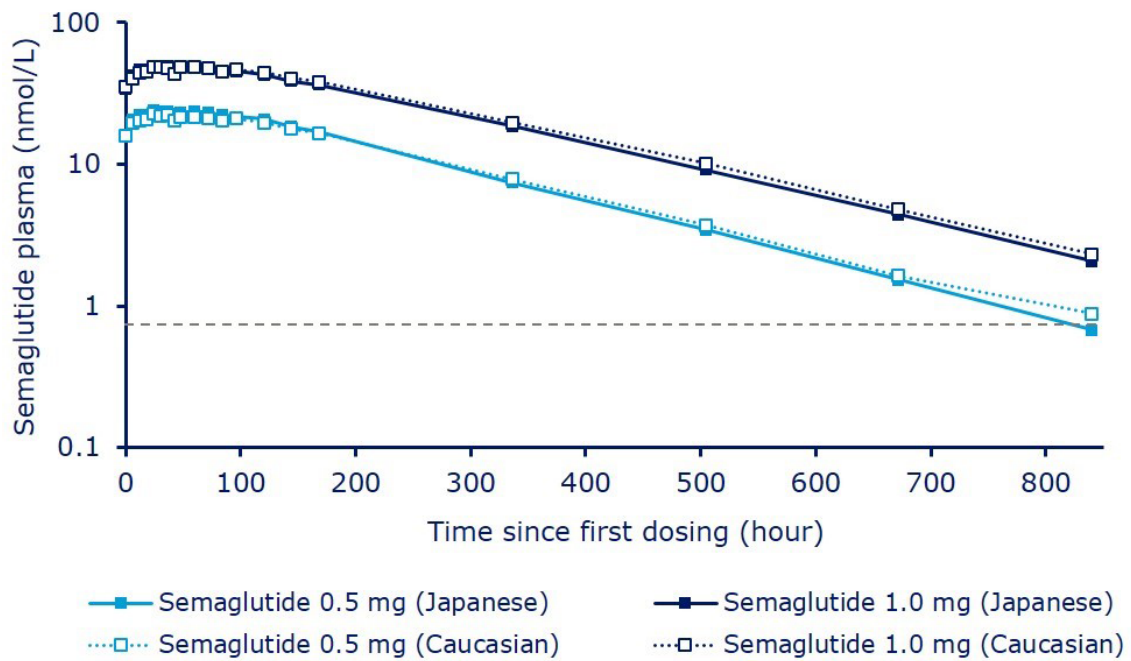

Values are geometric means, plotted on a logarithmic scale. All values below the lower limit of quantification (dashed line) are imputed. Terminal elimination half-life ( $t_{1/2}$ ) was derived from the terminal part of concentration–time curves after the last dose.

**Supplementary Figure S2. Mean semaglutide profile after the first dose: 0–168 hours**

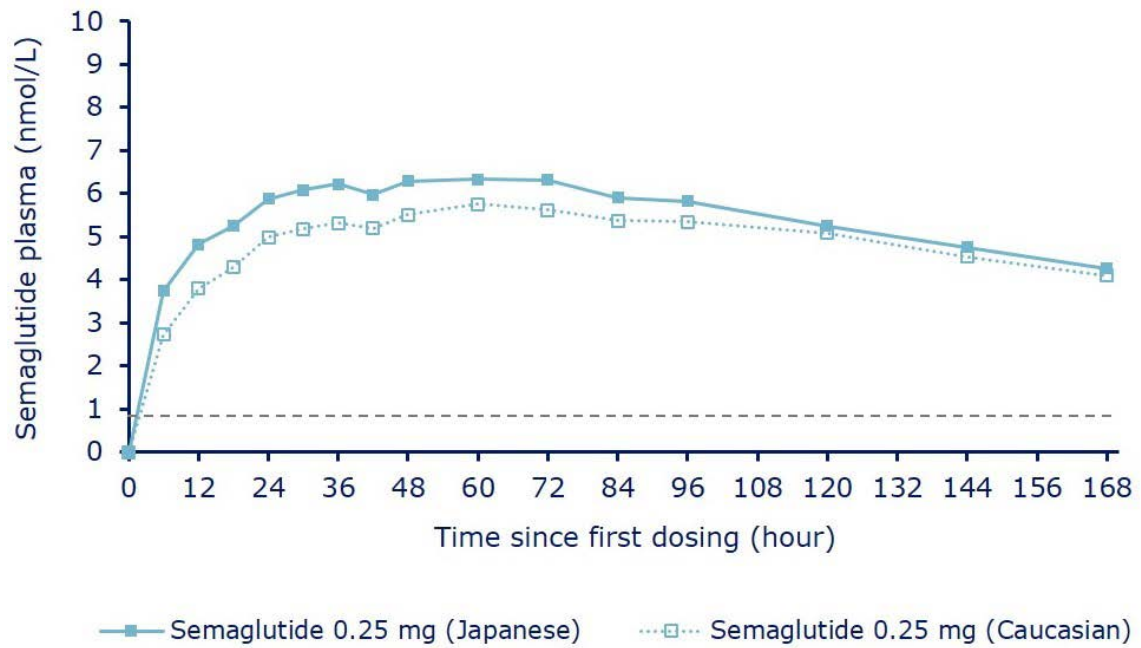

Values are arithmetic means. Note: the initial dose was 0.25 mg for all subjects receiving semaglutide. The dashed line indicates the lower limit of quantification.

*Supplementary Table S1. Statistical analysis of pharmacokinetic endpoints after first dose*

|                                          | <b>Japanese subjects<br/>(n=16)</b> | <b>Caucasian subjects<br/>(n=16)</b> | <b>Estimated race ratio [95% CI]<br/>(Japanese:Caucasian)</b> |
|------------------------------------------|-------------------------------------|--------------------------------------|---------------------------------------------------------------|
| AUC <sub>0-168h,sema,SD</sub> (nmol*h/L) | 895 (14.6)                          | 804 (17.7)                           | 1.11 [0.99; 1.25]                                             |
| C <sub>max,sema,SD</sub> (nmol/L)        | 6.8 (17.2)                          | 6.0 (20.4)                           | 1.14 [1.00; 1.30]                                             |
| t <sub>max,sema,SD</sub> (h)†            | 48 [24; 84]                         | 60.0 [36; 144]                       | -                                                             |

Values are geometric means (CV) and estimated race ratios [95% CI]. †Values are median [minimum; maximum]. The endpoint is logarithmic transformed and analyzed in a linear normal model with race as a fixed factor. AUC, area under the curve; CI, confidence interval; C<sub>max</sub>, maximum concentration; CV, coefficient of variation (%); SD, single dose; t<sub>max</sub>, time to maximum concentration.

*Supplementary Table S2. Statistical analysis of pharmacodynamic endpoints of semaglutide*

|                                | Japanese subjects                                  |         |                                                    |         | Caucasian subjects                                 |         |                                                    |         |
|--------------------------------|----------------------------------------------------|---------|----------------------------------------------------|---------|----------------------------------------------------|---------|----------------------------------------------------|---------|
|                                | ETD<br>Semaglutide<br>0.5 mg – placebo<br>[95% CI] | p-value | ETD<br>Semaglutide<br>1.0 mg – placebo<br>[95% CI] | p-value | ETD<br>Semaglutide<br>0.5 mg – placebo<br>[95% CI] | p-value | ETD<br>Semaglutide<br>1.0 mg – placebo<br>[95% CI] | p-value |
| Body weight (kg)               | -2.42<br>[-4.46; -0.39]                            | ≤0.05   | -6.06<br>[-8.10; -4.02]                            | ≤0.05   | -4.30<br>[-6.52; -2.08]                            | ≤0.05   | -8.28<br>[-10.55; -6.01]                           | ≤0.05   |
| Fasting plasma glucose (mg/dL) | -10.8<br>[-19.7; -1.9]                             | ≤0.05   | -12.9<br>[-21.7; -4.1 ]                            | ≤0.05   | -0.8<br>[-9.4; 7.8]                                | >0.05   | -9.7<br>[-18.8; -0.5]                              | ≤0.05   |
| (mmol/L)                       | -0.60<br>[-1.10; -0.10]                            | ≤0.05   | -0.72<br>[-1.20; -0.23]                            | ≤0.05   | -0.04<br>[-0.52; 0.004]                            | >0.05   | -0.54<br>[-1.04; -0.03]                            | ≤0.05   |
|                                | ETR<br>Semaglutide<br>0.5 mg:placebo<br>[95% CI]   | p-value | ETR<br>Semaglutide<br>1.0 mg:placebo<br>[95% CI]   | p-value | ETR<br>Semaglutide<br>0.5 mg:placebo<br>[95% CI]   | p-value | ETR<br>Semaglutide<br>1.0 mg:placebo<br>[95% CI]   | p-value |
| Fasting insulin (pmol/L)       | 1.38<br>[0.77; 2.47]                               | >0.05   | 1.13<br>[0.63; 2.03]                               | >0.05   | 1.07<br>[0.59; 1.96]                               | >0.05   | 0.77<br>[0.41; 1.43]                               | >0.05   |
| Fasting C-peptide (nmol/L)     | 1.43<br>[0.95; 2.14]                               | >0.05   | 1.26<br>[0.83; 1.89]                               | >0.05   | 0.94<br>[0.61; 1.45]                               | >0.05   | 0.82<br>[0.52; 1.29]                               | >0.05   |
| Fasting glucagon (pg/mL)       | 1.02<br>[0.78; 1.33]                               | >0.05   | 0.86<br>[0.66; 1.12]                               | >0.05   | 0.96<br>[0.73; 1.26]                               | >0.05   | 0.88<br>[0.67; 1.17]                               | >0.05   |
| Fasting pro-insulin (pmol/L)   | 0.96<br>[0.56; 1.63]                               | >0.05   | 0.63<br>[0.37; 1.09]                               | >0.05   | 1.07<br>[0.62; 1.84]                               | >0.05   | 0.75<br>[0.41; 1.37]                               | >0.05   |

Values are estimated treatment differences [95% CI] or estimated treatment ratios [95% CI]. The endpoint is analyzed by a mixed model for repeated measurements where all post baseline measurements obtained at planned visits until end of treatment enter as the dependent variables, and visit, dose group, race and race-by-dose group interaction are included as fixed factors and baseline value as covariate. Furthermore, interaction terms of visit-by-dose group, visit-by-race, visit-by-race-by-dose group and visit-by-baseline value were included. Fasting insulin, C-peptide, glucagon and pro-insulin were logarithmically transformed and analyzed. CI, confidence interval; ETD, estimated treatment difference; ETR, estimated treatment ratio.

*Supplementary Table S3. Adverse event summary*

|                                    | Japanese subjects     |        |   |                       |        |    |         |        |   | Caucasian subjects    |        |   |                       |        |    |         |        |   |
|------------------------------------|-----------------------|--------|---|-----------------------|--------|----|---------|--------|---|-----------------------|--------|---|-----------------------|--------|----|---------|--------|---|
|                                    | Semaglutide<br>0.5 mg |        |   | Semaglutide<br>1.0 mg |        |    | Placebo |        |   | Semaglutide<br>0.5 mg |        |   | Semaglutide<br>1.0 mg |        |    | Placebo |        |   |
|                                    | N                     | (%)    | E | N                     | (%)    | E  | N       | (%)    | E | N                     | (%)    | E | N                     | (%)    | E  | N       | (%)    | E |
| <b>Number of subjects</b>          | 8                     |        |   | 8                     |        |    | 6       |        |   | 8                     |        |   | 8                     |        |    | 6       |        |   |
| <b>Adverse events</b>              | 6                     | (75.0) | 8 | 5                     | (62.5) | 13 | 1       | (16.7) | 1 | 4                     | (50.0) | 6 | 5                     | (62.5) | 12 | 2       | (33.3) | 2 |
| <b>Severity</b>                    |                       |        |   |                       |        |    |         |        |   |                       |        |   |                       |        |    |         |        |   |
| Moderate                           | 1                     | (12.5) | 2 | 0                     |        |    | 0       |        |   | 2                     | (25.0) | 2 | 1                     | (12.5) | 3  | 0       |        |   |
| Mild                               | 5                     | (62.5) | 6 | 5                     | (62.5) | 13 | 1       | (16.7) | 1 | 3                     | (37.5) | 4 | 4                     | (50.0) | 9  | 2       | (33.3) | 2 |
| <b>By system organ class†</b>      |                       |        |   |                       |        |    |         |        |   |                       |        |   |                       |        |    |         |        |   |
| Gastrointestinal disorders         | 5                     | (62.5) | 6 | 3                     | (37.5) | 9  | 1       | (16.7) | 1 | 2                     | (25.0) | 4 | 2                     | (25.0) | 5  | 0       |        |   |
| Metabolism and nutrition disorders | 0                     |        |   | 3                     | (37.5) | 3  | 0       |        |   | 0                     |        |   | 3                     | (37.5) | 3  | 0       |        |   |

Adverse events include events that occurred from first exposure to the follow-up visit. †Frequently reported adverse events ( $\geq 3$  subjects) are shown by system organ class.

E, number of events; N, number of subjects; %, proportion of subjects.
